# Supplementary material for: Mining the Human Phenome Using Allelic Scores That Index Biological Intermediates
Source: PubMed Central journal article supplement (PMC3814299; doi:10.1371/journal.pgen.1003919), 2013-10-31

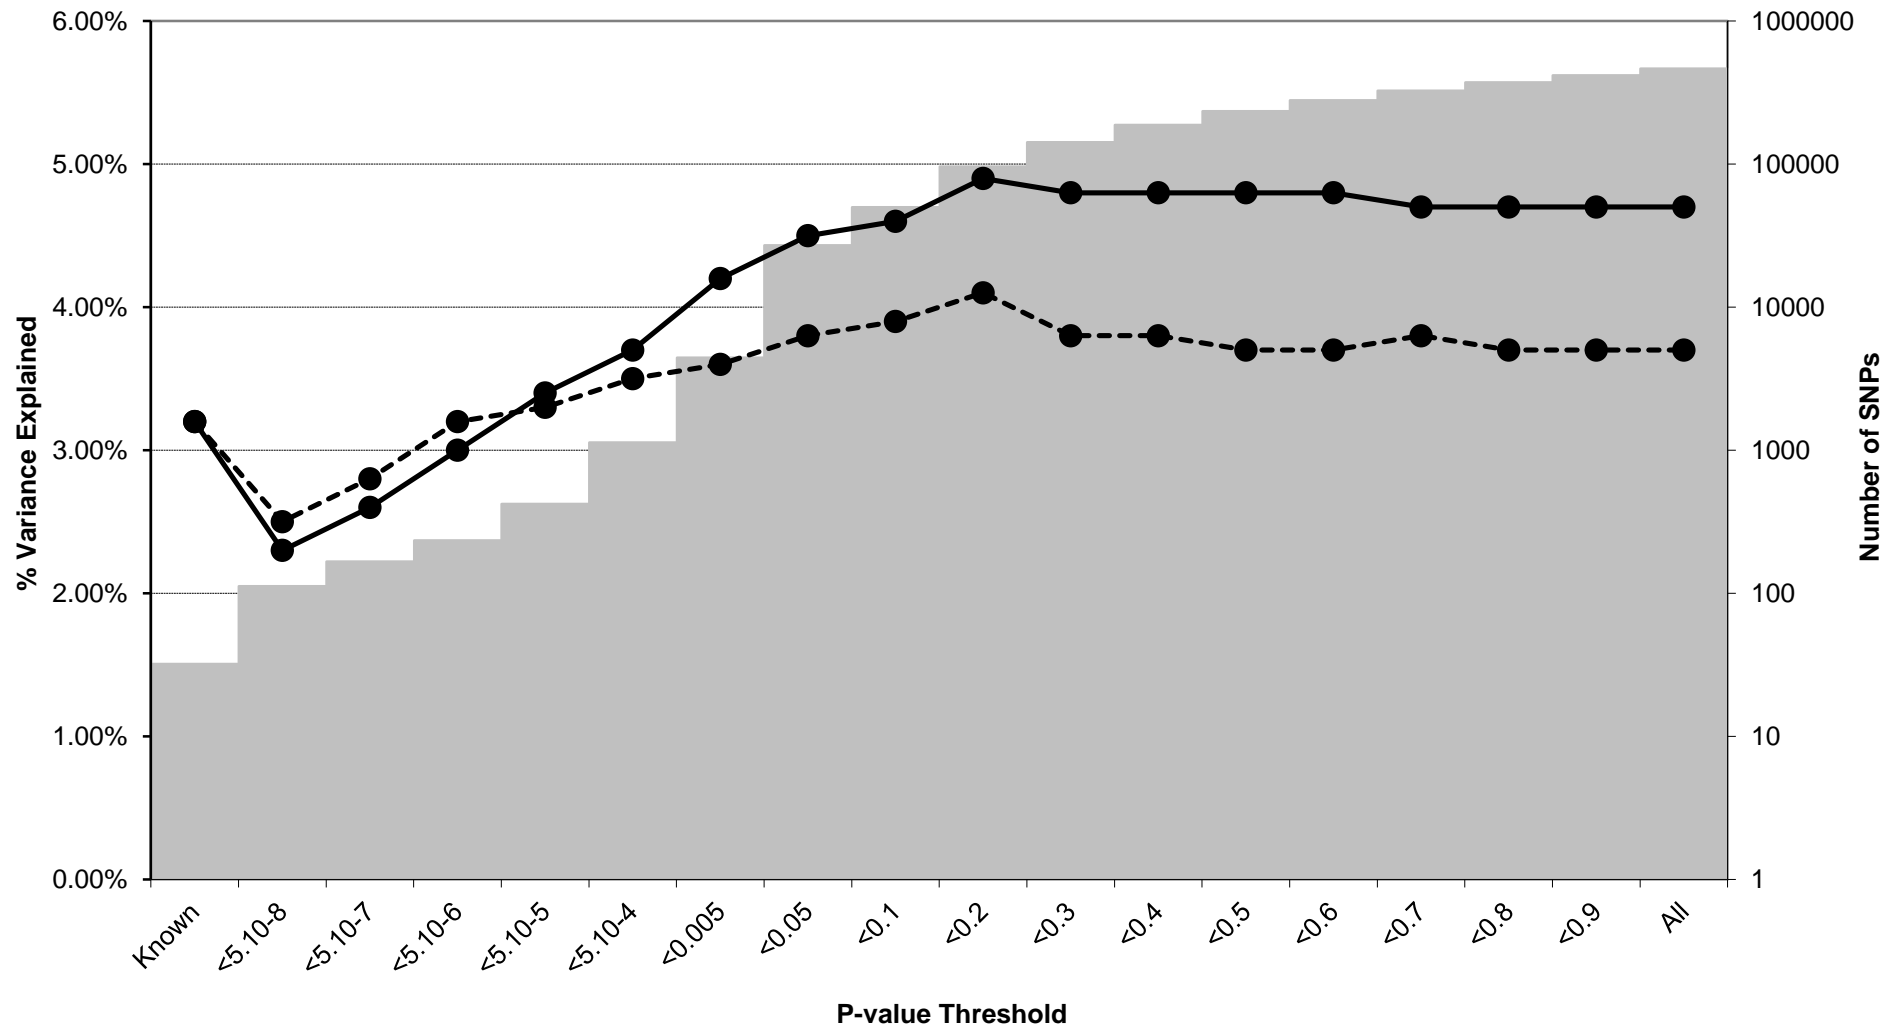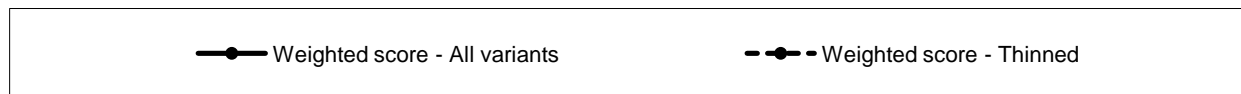

Supplement: pgen.1003919.s001.pdf [file pgen.1003919.s001.pdf]
