# Supplementary material for: Mining the Human Phenome Using Allelic Scores That Index Biological Intermediates
Source: PubMed Central journal article supplement (PMC3814299; doi:10.1371/journal.pgen.1003919), 2013-10-31
Supplement: pgen.1003919.s009.pdf [file pgen.1003919.s009.pdf]

## Members of the TAG Consortium

Helena Furberg<sup>1,2</sup>, YunJung Kim<sup>1</sup>, Jennifer Dackor<sup>1</sup>, Eric Boerwinkle<sup>3</sup>, Nora Franceschini<sup>4</sup>, Diego Ardissino<sup>5</sup>, Luisa Bernardinelli<sup>6,7</sup>, Pier M Mannucci<sup>8</sup>, Francesco Mauri<sup>9</sup>, Piera A Merlini<sup>9</sup>, Devin Absher<sup>10</sup>, Themistocles L Assimes<sup>11</sup>, Stephen P Fortmann<sup>12</sup>, Carlos Iribarren<sup>13</sup>, Joshua W Knowles<sup>11</sup>, Thomas Quertermous<sup>11</sup>, Luigi Ferrucci<sup>14</sup>, Toshiko Tanaka<sup>15</sup>, Joshua C Bis<sup>16,17</sup>, Curt D Furberg<sup>18</sup>, Talin Haritunians<sup>19</sup>, Barbara McKnight<sup>16,20</sup>, Bruce M Psaty<sup>16,17,21,22</sup>, Kent D Taylor<sup>19</sup>, Evan L Thacker<sup>16,23</sup>, Peter Almgren<sup>24</sup>, Leif Groop<sup>24</sup>, Claes Ladenvall<sup>24</sup>, Michael Boehnke<sup>25</sup>, Anne U Jackson<sup>25</sup>, Karen L Mohlke<sup>1,2</sup>, Heather M Stringham<sup>25</sup>, Jaakko Tuomilehto<sup>26–28</sup>, Emelia J Benjamin<sup>29,30</sup>, Shih-Jen Hwang<sup>31</sup>, Daniel Levy<sup>32</sup>, Sarah Rosner Preis<sup>31</sup>, Ramachandran S Vasani<sup>29,32</sup>, Jubao Duan<sup>33</sup>, Pablo V Gejman<sup>33</sup>, Douglas F Levinson<sup>34</sup>, Alan R Sanders<sup>33</sup>, Jianxin Shi<sup>35</sup>, Esther H Lips<sup>36</sup>, James D McKay<sup>36</sup>, Antonio Agudo<sup>37</sup>, Luigi Barzan<sup>38</sup>, Vladimir Bencko<sup>39</sup>, Simone Benhamou<sup>40,41</sup>, Xavier Castellsagué<sup>37</sup>, Cristina Canova<sup>42</sup>, David I Conway<sup>43</sup>, Eleonora Fabianova<sup>44</sup>, Lenka Foretova<sup>45</sup>, Vladimir Janout<sup>46</sup>, Claire M Healy<sup>47</sup>, Ivana Holcátová<sup>39</sup>, Kristina Kjaerheim<sup>48</sup>, Pagona Lagiou<sup>49</sup>, Jolanta Lissowska<sup>50</sup>, Ray Lowry<sup>51</sup>, Tatiana V Macfarlane<sup>52</sup>, Dana Mates<sup>53</sup>, Lorenzo Richiardi<sup>54</sup>, Peter Rudnai<sup>55</sup>, Neonilia Szeszenia-Dabrowska<sup>56</sup>, David Zaridze<sup>57</sup>, Ariana Znaor<sup>58</sup>, Mark Lathrop<sup>59,60</sup>, Paul Brennan<sup>36</sup>, Stefania Bandinelli<sup>61</sup>, Timothy M Frayling<sup>62</sup>, Jack M Guralnik<sup>63</sup>, Yuri Milaneschi<sup>64</sup>, John R B Perry<sup>62</sup>, David Altshuler<sup>65–70</sup>, Roberto Elosua<sup>71</sup>, Sek Kathiresan<sup>65,68,72</sup>, Gavin Lucas<sup>71</sup>, Olle Melander<sup>73</sup>, Christopher J O'Donnell<sup>74</sup>, Veikko Salomaa<sup>75</sup>, Stephen M Schwartz<sup>16</sup>, Benjamin F Voight<sup>76</sup>, Brenda W Penninx<sup>77,78</sup>, Johannes H Smit<sup>77,78</sup>, Nicole Vogelzangs<sup>77,78</sup>, Dorret I Boomsma<sup>79</sup>, Eco J C de Geus<sup>79</sup>, Jacqueline M Vink<sup>79</sup>, Gonneke Willemsen<sup>79</sup>, Stephen J Chanock<sup>80</sup>, Fangyi Gu<sup>81</sup>, Susan E Hankinson<sup>82</sup>, David J Hunter<sup>81</sup>, Albert Hofman<sup>83</sup>, Henning Tiemeier<sup>83,84</sup>, Andre G Uitterlinden<sup>83,85</sup>, Cornelia M van Duijn<sup>83,86</sup>, Stefan Walter<sup>83,87</sup>, Daniel I Chasman<sup>88</sup>, Brendan M Everett<sup>88,89</sup>, Guillaume Paré<sup>88</sup>, Paul M Ridker<sup>88,89</sup>, Ming D Li<sup>90</sup>, Hermine H Maes<sup>91,92</sup>, Janet Audrain-McGovern<sup>93</sup>, Danielle Posthuma<sup>94,95</sup>, Laura M Thornton<sup>96</sup>, Caryn Lerman<sup>93,97</sup>, Jaakko Kaprio<sup>26,75,98</sup>, Jed E Rose<sup>99</sup>, John P A Ioannidis<sup>100–102</sup>, Peter Kraft<sup>81</sup>, Dan-Yu Lin<sup>103</sup> & Patrick F Sullivan<sup>1,2</sup>

<sup>1</sup> Department of Genetics, University of North Carolina, Chapel Hill, North Carolina, USA. <sup>2</sup>University of North Carolina Lineberger Comprehensive Cancer Center, University of North Carolina, Chapel Hill, North Carolina, USA. <sup>3</sup>Human Genetics Center and Institute for Molecular Medicine, University of Texas Health Science Center, Houston, Texas, USA. <sup>4</sup>Department of Epidemiology, University of North Carolina, Chapel Hill, North Carolina, USA. <sup>5</sup>Division of Cardiology, Azienda Ospedaliero-Universitaria di Parma, Parma, Italy. <sup>6</sup>Statistical Laboratory, Centre for Mathematical Sciences, University of Cambridge, Cambridge, UK. <sup>7</sup>Department of Applied Health Sciences, University of Pavia, Pavia, Italy. <sup>8</sup>Department of Internal Medicine and Medical Specialties, Fondazione Istituto di Ricovero e Cura a Carattere Scientifico, Ospedale Maggiore, Mangiagalli e Regina Elena, University of Milan, Milan, Italy. <sup>9</sup>Department of Cardiology, Azienda Ospedaliera Niguarda Ca' Granda, Milan, Italy. <sup>10</sup>HudsonAlpha Institute for Biotechnology, Huntsville, Alabama, USA. <sup>11</sup>Cardiovascular Medicine, Stanford University, Stanford, California, USA. <sup>12</sup>Stanford Prevention Research Center, Stanford University, Stanford, California, USA. <sup>13</sup>Kaiser Permanente Northern California Division of Research, Oakland, California, USA. <sup>14</sup>National Institute on Aging, Baltimore, Maryland, USA. <sup>15</sup>Medstart Research Institute, National Institute on Aging, Baltimore, Maryland, USA. <sup>16</sup>Cardiovascular Health Research Unit, University of Washington, Seattle, Washington, USA. <sup>17</sup>Department of Medicine, University of Washington, Seattle, Washington, USA. <sup>18</sup>Division of Public Health Sciences, Wake Forest University Health Sciences, Winston-Salem, North Carolina, USA. <sup>19</sup>Medical Genetics Institute, Cedars-Sinai Medical Center, Los Angeles, California, USA. <sup>20</sup>Department of Biostatistics, University of Washington, Seattle, Washington, USA. <sup>21</sup>Department of Epidemiology and Health Services, University of Washington, Seattle, Washington, USA. <sup>22</sup>Group Health Research Institute, Seattle, Washington, USA. <sup>23</sup>Department of Epidemiology, University of Washington, Seattle, Washington, USA. <sup>24</sup>Department of Clinical Sciences, Diabetes and Endocrinology Unit, Lund University, Malmö, Sweden. <sup>25</sup>Department of Biostatistics, School of Public Health, University of Michigan, Ann Arbor, Michigan, USA. <sup>26</sup>Hjelt Institute, Department of Public Health, University of Helsinki, Helsinki, Finland. <sup>27</sup>Diabetes Prevention Unit, National Institute for Health and Welfare, Helsinki, Finland. <sup>28</sup>Finland South Ostrobothnia Central Hospital, Seinäjoki, Finland. <sup>29</sup>Boston University School of Medicine, Boston, Massachusetts, USA. <sup>30</sup>Boston University School of Public Health, Boston, Massachusetts, USA. <sup>31</sup>Center for Population Studies, National Heart, Lung, and Blood Institute, Bethesda, Maryland, USA. <sup>32</sup>Department of Medicine, Sections of Preventive Medicine and Cardiology, Boston University School of Medicine, Boston, Massachusetts, USA. <sup>33</sup>Center for Psychiatric Genetics, NorthShore University HealthSystem Research Institute, Evanston, Illinois, USA. <sup>34</sup>Department of Psychiatry and Behavioral Sciences, Stanford University, Stanford, California, USA. <sup>35</sup>Biostatistics Branch, Division of Cancer Epidemiology and Genetics, National Cancer Institute, Bethesda, Maryland, USA. <sup>36</sup>International Agency for Research on Cancer (IARC), Lyon, France. <sup>37</sup>Institut Català d'Oncologia, Barcelona, Spain. <sup>38</sup>General Hospital, Pordenone, Italy. <sup>39</sup>Institute of Hygiene and Epidemiology, First Faculty of Medicine, Charles University, Prague, Czech

Republic. 40Institut National de la santé et de la Recherche Medicalé (INSERM) U794, Paris, France. 41Institut Gustave Roussy, Villejuif, France. 42Department of Environmental Medicine and Public Health, University of Padua, Padua, Italy. 43University of Glasgow Medical Faculty Dental School, Glasgow, UK. 44Specialized Institute of Hygiene and Epidemiology, Banska Bystrica, Slovakia. 45Department of Cancer Epidemiology and Genetics, Masaryk Memorial Cancer Institute, Brno, Czech Republic. 46Palacky University, Olomouc, Czech Republic. 47Trinity College School of Dental Science, Dublin, Ireland. 48Cancer Registry of Norway, Oslo, Norway. 49University of Athens School of Medicine, Athens, Greece. 50Department of Cancer Epidemiology and Prevention, Maria Sklodowska-Curie Cancer Center and Institute of Oncology, Warsaw, Poland. 51University of Newcastle Dental School, Newcastle, UK. 52University of Aberdeen School of Medicine, Aberdeen, UK. 53Institute of Public Health, Bucharest, Romania. 54Center for Experimental Research and Medical Studies, University of Turin, Turin, Italy. 55National Institute of Environmental Health, Budapest, Hungary. 56Department of Epidemiology, Institute of Occupational Medicine, Lodz, Poland. 57Institute of Carcinogenesis, Cancer Research Centre, Moscow, Russia. 58Croatian National Cancer Registry, Zagreb, Croatia. 59Centre National de Genotypage, Institut Genomique, Commissariat à l'énergie Atomique, Evry, France. 60Fondation Jean Dausset-Centre d'Étude du Polymorphisme Humain (CEPH), Paris, France. 61Geriatric Unit, Azienda Sanitaria di Firenze, Florence, Italy. 62Genetics of Complex Traits, Peninsula Medical School, The University of Exeter, Exeter, UK. 63Laboratory of Epidemiology, Demography and Biometry, National Institute on Aging, Bethesda, Maryland, USA. 64Tuscany Health Regional Agency, Florence, Italy. 65Broad Institute of Harvard and Massachusetts Institute of Technology, Cambridge, Massachusetts, USA. 66Department of Molecular Biology, Massachusetts General Hospital, Boston, Massachusetts, USA. 67Diabetes Unit, Massachusetts General Hospital, Boston, Massachusetts, USA. 68Center for Human Genetics Research, Massachusetts General Hospital, Boston, Massachusetts, USA. 69Department of Genetics, Harvard Medical School, Boston, Massachusetts, USA. 70Department of Medicine, Harvard Medical School, Boston, Massachusetts, USA. 71Cardiovascular Epidemiology and Genetics, Institut Municipal d'Investigacio Medica, Barcelona, Spain. 72Harvard Medical School, Boston, Massachusetts, USA. 73Department of Clinical Sciences, Hypertension and Cardiovascular Diseases, University Hospital Malmö, Lund University, Malmö, Sweden. 74National Heart, Lung, and Blood Institute's Framingham Heart Study, Framingham, Massachusetts, USA. 75National Institute for Health and Welfare (THL), Helsinki, Finland. 76Program in Medical and Population Genetics, Broad Institute of Harvard and Massachusetts Institute of Technology, Cambridge, Massachusetts, USA. 77EMGO Institute, Vrije Universiteit (VU) Medical Center, Amsterdam, The Netherlands. 78Department of Psychiatry, VU University Medical Center, Amsterdam, The Netherlands. 79Biological Psychology, VU University Amsterdam, Amsterdam, The Netherlands. 80Division of Cancer Epidemiology and Genetics, National Cancer Institute, Bethesda, Maryland, USA. 81Program in Molecular and Genetic Epidemiology, Department of Epidemiology, Harvard University, Boston, Massachusetts, USA. 82Channing Laboratory, Department of Medicine, Brigham and Women's Hospital and Harvard Medical School, Boston, Massachusetts, USA. 83Department of Epidemiology, Erasmus Medical Center, Member of the Netherlands Consortium on Healthy Aging, Rotterdam, The Netherlands. 84Department of Child and Adolescent Psychiatry, Erasmus Medical Center, Rotterdam, The Netherlands. 85Department of Internal Medicine, Erasmus Medical Center, Rotterdam, The Netherlands. 86Centre for Medical Systems Biology, Erasmus Medical Center, Rotterdam, The Netherlands. 87Department of Public Health, Erasmus Medical Center, Rotterdam, The Netherlands. 88Division of Preventive Medicine, Department of Medicine, Brigham and Women's Hospital, Harvard Medical School, Boston, Massachusetts, USA. 89Division of Cardiovascular Medicine, Department of Medicine, Brigham and Women's Hospital, Harvard Medical School, Boston, Massachusetts, USA. 90Department of Psychiatry and Neurobehavioural Sciences, University of Virginia, Charlottesville, Virginia, USA. 91Virginia Institute for Psychiatric and Behavioral Genetics, Virginia Commonwealth University, Richmond, Virginia, USA. 92Massey Cancer Center, Virginia Commonwealth University, Richmond, Virginia, USA. 93Department of Psychiatry, University of Pennsylvania, Philadelphia, Pennsylvania, USA. 94Department of Functional Genomics, VU Amsterdam, Amsterdam, The Netherlands. 95Department of Medical Genomics, VU University Medical Center Amsterdam, Amsterdam, The Netherlands. 96Department of Psychiatry, University of North Carolina, Chapel Hill, North Carolina, USA. 97Abramson Cancer Center, University of Pennsylvania, Philadelphia, Pennsylvania, USA. 98Institute for Molecular Medicine, University of Helsinki, Helsinki, Finland. 99Department of Psychiatry and Behavioral Sciences, Duke University Medical Center, Durham, North Carolina, USA. 100Department of Hygiene and Epidemiology, University of Ioannina School of Medicine, Ioannina, Greece. 101Tufts Clinical and Translational Science Institute, Tufts University School of Medicine, Boston, Massachusetts, USA. 102Center for Genetic Epidemiology and Modeling, Institute for Clinical Research and Health Policy Studies, Tufts Medical Center, Boston, Massachusetts, USA. 103Department of Biostatistics, University of North Carolina, Chapel Hill, North Carolina, USA.
