# Supplementary material for: Mining the Human Phenome Using Allelic Scores That Index Biological Intermediates
Source: PubMed Central journal article supplement (PMC3814299; doi:10.1371/journal.pgen.1003919), 2013-10-31
Supplement: pgen.1003919.s010.pdf [file pgen.1003919.s010.pdf]

**Table S1. Association between case-control status in the WTCCC and an allelic score that proxies for BMI.** The left hand side of the table shows results for an allelic score consisting of all SNPs that meet a certain threshold (“All SNPs”), whilst the right side shows results for an allelic score consisting of all SNPs that meet a certain threshold with SNPs from known regions removed from its construction (“Complement”). SNPs have either been weighted according to their effect size from a previous meta-analysis (“Weighted”), or with each SNP getting an equal weighting (“Unweighted”). Results are shown for seventeen different p value thresholds and the number of SNPs that went into construction of the score for each threshold is listed also. Results are shown for seven different diseases. BD = Bipolar Disorder; CHD = Coronary Heart Disease; HT = Hypertension; CD = Crohn’s Disease; RA = Rheumatoid Arthritis; T1D = Type 1 Diabetes; T2D = Type 2 Diabetes; Dir = Direction of effect; Pval = P value.

| All SNPs                             |          |                      |            |                      | Complement                          |          |      |            |      |
|--------------------------------------|----------|----------------------|------------|----------------------|-------------------------------------|----------|------|------------|------|
|                                      | Weighted |                      | Unweighted |                      |                                     | Weighted |      | Unweighted |      |
|                                      | Dir      | Pval                 | Dir        | Pval                 |                                     | Dir      | Pval | Dir        | Pval |
| $p < 5 \times 10^{-8}$<br>(158 SNPs) |          |                      |            |                      | $p < 5 \times 10^{-8}$<br>(8 SNPs)  |          |      |            |      |
| BD                                   | -        | 0.62                 | -          | 0.72                 |                                     | -        | 0.91 | -          | 0.79 |
| CHD                                  | +        | 0.17                 | +          | 0.22                 |                                     | +        | 0.91 | -          | 0.90 |
| HT                                   | -        | 0.58                 | -          | 0.74                 |                                     | +        | 0.97 | -          | 0.99 |
| CD                                   | +        | 0.90                 | +          | 0.75                 |                                     | +        | 0.61 | +          | 0.58 |
| RA                                   | +        | 0.15                 | +          | 0.086                |                                     | +        | 0.40 | +          | 0.40 |
| T1D                                  | +        | 0.77                 | +          | 0.79                 |                                     | -        | 0.66 | -          | 0.51 |
| T2D                                  | +        | $4.3 \times 10^{-7}$ | +          | $1.5 \times 10^{-5}$ |                                     | -        | 0.86 | -          | 0.95 |
|                                      |          |                      |            |                      |                                     |          |      |            |      |
| $p < 5 \times 10^{-7}$<br>(224 SNPs) |          |                      |            |                      | $p < 5 \times 10^{-7}$<br>(23 SNPs) |          |      |            |      |
| BD                                   | -        | 0.88                 | +          | 0.83                 |                                     | +        | 0.45 | +          | 0.46 |
| CHD                                  | +        | 0.13                 | +          | 0.15                 |                                     | +        | 0.15 | +          | 0.16 |
| HT                                   | -        | 0.63                 | -          | 0.77                 |                                     | +        | 0.12 | +          | 0.11 |
| CD                                   | +        | 0.81                 | +          | 0.57                 |                                     | +        | 0.17 | +          | 0.13 |
| RA                                   | +        | 0.15                 | +          | 0.11                 |                                     | +        | 0.73 | +          | 0.75 |
| T1D                                  | +        | 0.75                 | +          | 0.69                 |                                     | -        | 0.89 | -          | 0.82 |
| T2D                                  | +        | $1.3 \times 10^{-7}$ | +          | $3.0 \times 10^{-6}$ |                                     | +        | 0.17 | +          | 0.13 |

|                                       |   |                      |   |                      |                                       |   |                      |   |                      |
|---------------------------------------|---|----------------------|---|----------------------|---------------------------------------|---|----------------------|---|----------------------|
|                                       |   |                      |   |                      |                                       |   |                      |   |                      |
| $p < 5 \times 10^{-6}$<br>(398 SNPs)  |   |                      |   |                      | $p < 5 \times 10^{-6}$<br>(140 SNPs)  |   |                      |   |                      |
| BD                                    | - | 0.30                 | - | 0.26                 |                                       | - | $7.1 \times 10^{-3}$ | - | $7.7 \times 10^{-3}$ |
| CHD                                   | + | 0.18                 | + | 0.26                 |                                       | - | 0.74                 | - | 0.83                 |
| HT                                    | - | 0.53                 | - | 0.63                 |                                       | - | 0.87                 | + | 0.99                 |
| CD                                    | - | 0.62                 | - | 0.63                 |                                       | - | 0.23                 | - | 0.34                 |
| RA                                    | + | 0.18                 | + | 0.20                 |                                       | + | 0.94                 | - | 0.92                 |
| T1D                                   | + | 0.86                 | + | 0.94                 |                                       | - | 0.67                 | - | 0.52                 |
| T2D                                   | + | $5.3 \times 10^{-8}$ | + | $2.7 \times 10^{-6}$ |                                       | + | 0.30                 | + | 0.23                 |
|                                       |   |                      |   |                      |                                       |   |                      |   |                      |
| $p < 5 \times 10^{-5}$<br>(861 SNPs)  |   |                      |   |                      | $p < 5 \times 10^{-5}$<br>(534 SNPs)  |   |                      |   |                      |
| BD                                    | - | 0.20                 | - | 0.19                 |                                       | - | 0.021                | - | 0.031                |
| CHD                                   | + | 0.24                 | + | 0.33                 |                                       | - | 0.76                 | - | 0.94                 |
| HT                                    | - | 0.76                 | - | 0.99                 |                                       | + | 0.72                 | + | 0.64                 |
| CD                                    | - | 0.50                 | - | 0.51                 |                                       | - | 0.32                 | - | 0.41                 |
| RA                                    | + | 0.37                 | + | 0.65                 |                                       | - | 0.62                 | - | 0.49                 |
| T1D                                   | + | 0.84                 | + | 0.99                 |                                       | - | 0.88                 | - | 0.72                 |
| T2D                                   | + | $3.4 \times 10^{-8}$ | + | $6.8 \times 10^{-6}$ |                                       | + | 0.14                 | + | 0.13                 |
|                                       |   |                      |   |                      |                                       |   |                      |   |                      |
| $p < 5 \times 10^{-4}$<br>(2366 SNPs) |   |                      |   |                      | $p < 5 \times 10^{-4}$<br>(1895 SNPs) |   |                      |   |                      |
| BD                                    | - | 0.063                | - | 0.062                |                                       | - | $7.1 \times 10^{-3}$ | - | 0.013                |
| CHD                                   | + | 0.45                 | + | 0.64                 |                                       | - | 0.57                 | - | 0.73                 |
| HT                                    | + | 0.83                 | + | 0.56                 |                                       | + | 0.46                 | + | 0.39                 |
| CD                                    | - | 0.67                 | - | 0.79                 |                                       | - | 0.56                 | - | 0.70                 |
| RA                                    | + | 0.40                 | + | 0.61                 |                                       | - | 0.87                 | - | 0.85                 |
| T1D                                   | - | 0.85                 | - | 0.71                 |                                       | - | 0.41                 | - | 0.34                 |

|                                       |   |                       |   |                       |                                       |   |                       |   |                       |
|---------------------------------------|---|-----------------------|---|-----------------------|---------------------------------------|---|-----------------------|---|-----------------------|
| T2D                                   | + | $3.9 \times 10^{-9}$  | + | $9.8 \times 10^{-7}$  |                                       | + | $4.8 \times 10^{-3}$  | + | $3.3 \times 10^{-3}$  |
|                                       |   |                       |   |                       |                                       |   |                       |   |                       |
| p< $5 \times 10^{-3}$<br>(8402 SNPs)  |   |                       |   |                       | p< $5 \times 10^{-3}$<br>(7577 SNPs)  |   |                       |   |                       |
| BD                                    | - | 0.036                 | - | 0.062                 |                                       | - | $9.0 \times 10^{-3}$  | - | 0.025                 |
| CHD                                   | + | 0.36                  | + | 0.41                  |                                       | + | 0.89                  | + | 0.65                  |
| HT                                    | + | 0.20                  | + | 0.082                 |                                       | + | 0.077                 | + | 0.050                 |
| CD                                    | + | 0.46                  | + | 0.27                  |                                       | + | 0.49                  | + | 0.33                  |
| RA                                    | + | 0.50                  | + | 0.66                  |                                       | - | 0.94                  | - | 0.98                  |
| T1D                                   | - | 0.90                  | - | 0.84                  |                                       | - | 0.57                  | - | 0.56                  |
| T2D                                   | + | $1.3 \times 10^{-13}$ | + | $1.8 \times 10^{-11}$ |                                       | + | $1.6 \times 10^{-7}$  | + | $5.4 \times 10^{-8}$  |
|                                       |   |                       |   |                       |                                       |   |                       |   |                       |
| p< $5 \times 10^{-2}$<br>(36921 SNPs) |   |                       |   |                       | p< $5 \times 10^{-2}$<br>(35246 SNPs) |   |                       |   |                       |
| BD                                    | - | 0.013                 | - | 0.028                 |                                       | - | $3.2 \times 10^{-3}$  | - | $8.7 \times 10^{-3}$  |
| CHD                                   | + | 0.20                  | + | 0.25                  |                                       | + | 0.48                  | + | 0.42                  |
| HT                                    | + | 0.58                  | + | 0.46                  |                                       | + | 0.48                  | + | 0.42                  |
| CD                                    | + | 0.30                  | + | 0.17                  |                                       | + | 0.32                  | + | 0.21                  |
| RA                                    | + | 0.78                  | - | 0.98                  |                                       | - | 0.77                  | - | 0.71                  |
| T1D                                   | + | 0.98                  | - | 0.93                  |                                       | - | 0.69                  | - | 0.64                  |
| T2D                                   | + | $<2 \times 10^{-16}$  | + | $1.3 \times 10^{-14}$ |                                       | + | $6.3 \times 10^{-12}$ | + | $5.1 \times 10^{-12}$ |
|                                       |   |                       |   |                       |                                       |   |                       |   |                       |
| p<0.1<br>(60232 SNPs)                 |   |                       |   |                       | p<0.1<br>(58020 SNPs)                 |   |                       |   |                       |
| BD                                    | - | $8.6 \times 10^{-3}$  | - | 0.015                 |                                       | - | $2.3 \times 10^{-3}$  | - | $5.3 \times 10^{-3}$  |
| CHD                                   | + | 0.28                  | + | 0.42                  |                                       | + | 0.60                  | + | 0.62                  |
| HT                                    | + | 0.90                  | + | 0.87                  |                                       | + | 0.84                  | + | 0.88                  |
| CD                                    | + | 0.34                  | + | 0.28                  |                                       | + | 0.37                  | + | 0.32                  |
| RA                                    | - | 0.89                  | - | 0.56                  |                                       | - | 0.47                  | - | 0.35                  |

|                        |   |                       |   |                       |                        |   |                       |   |                       |
|------------------------|---|-----------------------|---|-----------------------|------------------------|---|-----------------------|---|-----------------------|
| T1D                    | - | 0.87                  | - | 0.70                  |                        | - | 0.60                  | - | 0.50                  |
| T2D                    | + | $3.3 \times 10^{-16}$ | + | $3.2 \times 10^{-13}$ |                        | + | $2.9 \times 10^{-11}$ | + | $6.9 \times 10^{-11}$ |
|                        |   |                       |   |                       |                        |   |                       |   |                       |
| p<0.2<br>(101903 SNPs) |   |                       |   |                       | p<0.2<br>(98818 SNPs)  |   |                       |   |                       |
| BD                     | - | 0.025                 | - | 0.058                 |                        | - | $9.1 \times 10^{-3}$  | - | 0.028                 |
| CHD                    | + | 0.34                  | + | 0.57                  |                        | + | 0.64                  | + | 0.74                  |
| HT                     | - | 0.98                  | - | 0.94                  |                        | - | 0.96                  | - | 0.86                  |
| CD                     | + | 0.58                  | + | 0.65                  |                        | + | 0.63                  | + | 0.70                  |
| RA                     | - | 0.58                  | - | 0.20                  |                        | - | 0.28                  | - | 0.12                  |
| T1D                    | - | 0.97                  | - | 0.75                  |                        | - | 0.72                  | - | 0.61                  |
| T2D                    | + | $<2 \times 10^{-16}$  | + | $1.5 \times 10^{-13}$ |                        | + | $8.1 \times 10^{-12}$ | + | $3.0 \times 10^{-11}$ |
|                        |   |                       |   |                       |                        |   |                       |   |                       |
| p<0.3<br>(140135 SNPs) |   |                       |   |                       | p<0.3<br>(136309 SNPs) |   |                       |   |                       |
| BD                     | - | 0.030                 | - | 0.073                 |                        | - | 0.011                 | - | 0.037                 |
| CHD                    | + | 0.34                  | + | 0.58                  |                        | + | 0.61                  | + | 0.73                  |
| HT                     | - | 0.99                  | - | 0.88                  |                        | - | 0.97                  | - | 0.81                  |
| CD                     | + | 0.59                  | + | 0.71                  |                        | + | 0.63                  | + | 0.74                  |
| RA                     | - | 0.37                  | - | 0.074                 |                        | - | 0.18                  | - | 0.050                 |
| T1D                    | + | 0.96                  | - | 0.83                  |                        | - | 0.79                  | - | 0.68                  |
| T2D                    | + | $<2 \times 10^{-16}$  | + | $1.0 \times 10^{-13}$ |                        | + | $1.7 \times 10^{-12}$ | + | $9.1 \times 10^{-12}$ |
|                        |   |                       |   |                       |                        |   |                       |   |                       |
| p<0.4<br>(176024 SNPs) |   |                       |   |                       | p<0.4<br>(171538 SNPs) |   |                       |   |                       |
| BD                     | - | 0.046                 | - | 0.15                  |                        | - | 0.021                 | - | 0.093                 |
| CHD                    | + | 0.33                  | + | 0.55                  |                        | + | 0.57                  | + | 0.64                  |
| HT                     | + | 0.95                  | + | 0.95                  |                        | + | 0.96                  | + | 0.99                  |
| CD                     | + | 0.73                  | + | 0.95                  |                        | + | 0.74                  | + | 0.94                  |

|                        |   |                      |   |                       |                         |   |                       |   |                       |
|------------------------|---|----------------------|---|-----------------------|-------------------------|---|-----------------------|---|-----------------------|
| RA                     | - | 0.31                 | - | 0.058                 |                         | - | 0.16                  | - | 0.048                 |
| T1D                    | + | 0.88                 | - | 0.99                  |                         | - | 0.89                  | - | 0.90                  |
| T2D                    | + | $<2 \times 10^{-16}$ | + | $1.9 \times 10^{-13}$ |                         | + | $8.2 \times 10^{-13}$ | + | $8.6 \times 10^{-12}$ |
|                        |   |                      |   |                       |                         |   |                       |   |                       |
| p<0.5<br>(210612 SNPs) |   |                      |   |                       | p<0.5<br>(205518 SNPs)  |   |                       |   |                       |
| BD                     | - | 0.050                | - | 0.16                  |                         | - | 0.023                 | - | 0.11                  |
| CHD                    | + | 0.31                 | + | 0.50                  |                         | + | 0.54                  | + | 0.59                  |
| HT                     | - | 0.87                 | - | 0.78                  |                         | - | 0.86                  | - | 0.75                  |
| CD                     | + | 0.79                 | - | 0.92                  |                         | + | 0.80                  | - | 0.95                  |
| RA                     | - | 0.22                 | - | 0.023                 |                         | - | 0.11                  | - | 0.021                 |
| T1D                    | + | 0.85                 | + | 0.95                  |                         | - | 0.93                  | - | 0.98                  |
| T2D                    | + | $<2 \times 10^{-16}$ | + | $3.6 \times 10^{-13}$ |                         | + | $6.8 \times 10^{-13}$ | + | $1.3 \times 10^{-11}$ |
|                        |   |                      |   |                       |                         |   |                       |   |                       |
| p<0.6<br>(244122 SNPs) |   |                      |   |                       | p<0.6<br>(238451 SNPs)  |   |                       |   |                       |
| BD                     | - | 0.052                | - | 0.19                  |                         | - | 0.026                 | - | 0.14                  |
| CHD                    | + | 0.31                 | + | 0.51                  |                         | + | 0.51                  | + | 0.56                  |
| HT                     | - | 0.82                 | - | 0.64                  |                         | - | 0.81                  | - | 0.62                  |
| CD                     | + | 0.86                 | - | 0.78                  |                         | + | 0.85                  | - | 0.84                  |
| RA                     | - | 0.20                 | - | 0.019                 |                         | - | 0.095                 | - | 0.018                 |
| T1D                    | + | 0.81                 | + | 0.88                  |                         | - | 0.99                  | + | 0.91                  |
| T2D                    | + | $<2 \times 10^{-16}$ | + | $9.3 \times 10^{-13}$ |                         | + | $7.5 \times 10^{-13}$ | + | $2.6 \times 10^{-11}$ |
|                        |   |                      |   |                       |                         |   |                       |   |                       |
| p<0.7<br>(277294 SNPs) |   |                      |   |                       | p<0.7<br>(2710176 SNPs) |   |                       |   |                       |
| BD                     | - | 0.057                | - | 0.23                  |                         | - | 0.029                 | - | 0.18                  |
| CHD                    | + | 0.31                 | + | 0.53                  |                         | + | 0.50                  | + | 0.54                  |
| HT                     | - | 0.79                 | - | 0.57                  |                         | - | 0.79                  | - | 0.56                  |

|                        |   |                      |   |                       |                        |   |                       |   |                       |
|------------------------|---|----------------------|---|-----------------------|------------------------|---|-----------------------|---|-----------------------|
| CD                     | + | 0.89                 | - | 0.75                  |                        | + | 0.87                  | - | 0.83                  |
| RA                     | - | 0.19                 | - | 0.020                 |                        | - | 0.093                 | - | 0.019                 |
| T1D                    | + | 0.88                 | - | 0.91                  |                        | - | 0.93                  | - | 0.91                  |
| T2D                    | + | $<2 \times 10^{-16}$ | + | $4.0 \times 10^{-12}$ |                        | + | $9.0 \times 10^{-13}$ | + | $8.3 \times 10^{-11}$ |
|                        |   |                      |   |                       |                        |   |                       |   |                       |
| p<0.8<br>(309981 SNPs) |   |                      |   |                       | p<0.8<br>(303188 SNPs) |   |                       |   |                       |
| BD                     | - | 0.051                | - | 0.19                  |                        | - | 0.026                 | - | 0.15                  |
| CHD                    | + | 0.34                 | + | 0.75                  |                        | + | 0.54                  | + | 0.71                  |
| HT                     | - | 0.78                 | - | 0.55                  |                        | - | 0.78                  | - | 0.54                  |
| CD                     | + | 0.98                 | - | 0.43                  |                        | + | 0.96                  | - | 0.51                  |
| RA                     | - | 0.18                 | - | 0.016                 |                        | - | 0.086                 | - | 0.016                 |
| T1D                    | + | 0.95                 | - | 0.67                  |                        | - | 0.87                  | - | 0.68                  |
| T2D                    | + | $<2 \times 10^{-16}$ | + | $2.6 \times 10^{-11}$ |                        | + | $1.2 \times 10^{-12}$ | + | $4.2 \times 10^{-10}$ |
|                        |   |                      |   |                       |                        |   |                       |   |                       |
| p<0.9<br>(342383 SNPs) |   |                      |   |                       | p<0.9<br>(335045 SNPs) |   |                       |   |                       |
| BD                     | - | 0.052                | - | 0.22                  |                        | - | 0.027                 | - | 0.18                  |
| CHD                    | + | 0.37                 | - | 0.99                  |                        | + | 0.56                  | + | 0.94                  |
| HT                     | - | 0.76                 | - | 0.46                  |                        | - | 0.76                  | - | 0.46                  |
| CD                     | - | 0.98                 | - | 0.29                  |                        | + | 0.99                  | - | 0.36                  |
| RA                     | - | 0.18                 | - | 0.021                 |                        | - | 0.087                 | - | 0.020                 |
| T1D                    | + | 0.97                 | - | 0.57                  |                        | - | 0.85                  | - | 0.59                  |
| T2D                    | + | $<2 \times 10^{-16}$ | + | $2.7 \times 10^{-10}$ |                        | + | $1.6 \times 10^{-12}$ | + | $3.3 \times 10^{-9}$  |
|                        |   |                      |   |                       |                        |   |                       |   |                       |
| All<br>(375110 SNPs)   |   |                      |   |                       | All<br>(367220 SNPs)   |   |                       |   |                       |
| BD                     | - | 0.051                | - | 0.14                  |                        | - | 0.026                 | - | 0.11                  |
| CHD                    | + | 0.37                 | - | 0.82                  |                        | + | 0.57                  | - | 0.91                  |

|     |   |                      |   |                      |  |   |                       |   |                      |
|-----|---|----------------------|---|----------------------|--|---|-----------------------|---|----------------------|
| HT  | - | 0.76                 | - | 0.39                 |  | - | 0.76                  | - | 0.39                 |
| CD  | - | 0.97                 | - | 0.21                 |  | - | 0.99                  | - | 0.26                 |
| RA  | - | 0.18                 | - | $9.0 \times 10^{-3}$ |  | - | 0.085                 | - | $9.1 \times 10^{-3}$ |
| T1D | + | 0.97                 | - | 0.44                 |  | - | 0.85                  | - | 0.47                 |
| T2D | + | $<2 \times 10^{-16}$ | + | $4.9 \times 10^{-9}$ |  | + | $1.8 \times 10^{-12}$ | + | $5.0 \times 10^{-8}$ |
