# Supplementary material for: Mining the Human Phenome Using Allelic Scores That Index Biological Intermediates
Source: PubMed Central journal article supplement (PMC3814299; doi:10.1371/journal.pgen.1003919), 2013-10-31
Supplement: pgen.1003919.s013.pdf [file pgen.1003919.s013.pdf]

**Table S4. Association between case-control status in the WTCCC and an LD pruned allelic score that proxies for BMI.** The left hand side of the table shows results for a weighted allelic score consisting of all SNPs that meet a certain threshold (“All SNPs”), whilst the right side shows results for a weighted allelic score that has been pruned for LD (“Thinned Set”). Results are shown for seventeen different p value thresholds and the number of SNPs that went into construction of the score for each threshold is listed also. Results are shown for seven different diseases. BD = Bipolar Disorder; CHD = Coronary Heart Disease; HT = Hypertension; CD = Crohn’s Disease; RA = Rheumatoid Arthritis; T1D = Type 1 Diabetes; T2D = Type 2 Diabetes; Dir = Direction of effect; Pval = P value.

| All SNPs                             |     |                      | Thinned Set                         |     |                      |
|--------------------------------------|-----|----------------------|-------------------------------------|-----|----------------------|
|                                      | Dir | Pval                 |                                     | Dir | Pval                 |
| $p < 5 \times 10^{-8}$<br>(158 SNPs) |     |                      | $p < 5 \times 10^{-8}$<br>(30 SNPs) |     |                      |
| BD                                   | -   | 0.62                 |                                     | -   | 0.63                 |
| CHD                                  | +   | 0.17                 |                                     | +   | 0.27                 |
| HT                                   | -   | 0.58                 |                                     | -   | 0.82                 |
| CD                                   | +   | 0.90                 |                                     | +   | 0.80                 |
| RA                                   | +   | 0.15                 |                                     | +   | 0.13                 |
| T1D                                  | +   | 0.77                 |                                     | -   | 0.85                 |
| T2D                                  | +   | $4.3 \times 10^{-7}$ |                                     | +   | $3.2 \times 10^{-7}$ |
|                                      |     |                      |                                     |     |                      |
| $p < 5 \times 10^{-7}$<br>(224 SNPs) |     |                      | $p < 5 \times 10^{-7}$<br>(48 SNPs) |     |                      |
| BD                                   | -   | 0.88                 |                                     | -   | 0.92                 |
| CHD                                  | +   | 0.13                 |                                     | +   | 0.22                 |
| HT                                   | -   | 0.63                 |                                     | -   | 0.87                 |
| CD                                   | +   | 0.81                 |                                     | -   | 0.83                 |
| RA                                   | +   | 0.15                 |                                     | +   | 0.24                 |
| T1D                                  | +   | 0.75                 |                                     | -   | 0.64                 |
| T2D                                  | +   | $1.3 \times 10^{-7}$ |                                     | +   | $3.9 \times 10^{-7}$ |
|                                      |     |                      |                                     |     |                      |
| $p < 5 \times 10^{-6}$               |     |                      | $p < 5 \times 10^{-6}$              |     |                      |

|                                       |   |                      |                                      |   |                      |
|---------------------------------------|---|----------------------|--------------------------------------|---|----------------------|
| (398 SNPs)                            |   |                      | (102 SNPs)                           |   |                      |
| BD                                    | - | 0.30                 |                                      | - | 0.024                |
| CHD                                   | + | 0.18                 |                                      | - | 0.96                 |
| HT                                    | - | 0.53                 |                                      | - | 0.10                 |
| CD                                    | - | 0.62                 |                                      | - | 0.013                |
| RA                                    | + | 0.18                 |                                      | - | 0.65                 |
| T1D                                   | + | 0.86                 |                                      | - | 0.27                 |
| T2D                                   | + | $5.3 \times 10^{-8}$ |                                      | + | $2.3 \times 10^{-5}$ |
|                                       |   |                      |                                      |   |                      |
| $p < 5 \times 10^{-5}$<br>(861 SNPs)  |   |                      | $p < 5 \times 10^{-5}$<br>(222 SNPs) |   |                      |
| BD                                    | - | 0.20                 |                                      | - | 0.012                |
| CHD                                   | + | 0.24                 |                                      | - | 0.35                 |
| HT                                    | - | 0.76                 |                                      | - | 0.13                 |
| CD                                    | - | 0.50                 |                                      | - | 0.031                |
| RA                                    | + | 0.37                 |                                      | - | 0.17                 |
| T1D                                   | + | 0.84                 |                                      | - | 0.091                |
| T2D                                   | + | $3.4 \times 10^{-8}$ |                                      | + | $8.9 \times 10^{-6}$ |
|                                       |   |                      |                                      |   |                      |
| $p < 5 \times 10^{-4}$<br>(2366 SNPs) |   |                      | $p < 5 \times 10^{-4}$<br>(670 SNPs) |   |                      |
| BD                                    | - | 0.063                |                                      | - | 0.013                |
| CHD                                   | + | 0.45                 |                                      | - | 0.50                 |
| HT                                    | + | 0.83                 |                                      | - | 0.50                 |
| CD                                    | - | 0.67                 |                                      | - | 0.82                 |
| RA                                    | + | 0.40                 |                                      | - | 0.27                 |
| T1D                                   | - | 0.85                 |                                      | - | 0.036                |
| T2D                                   | + | $3.9 \times 10^{-9}$ |                                      | + | $6.6 \times 10^{-8}$ |
|                                       |   |                      |                                      |   |                      |

|                                        |   |                       |                                        |   |                       |
|----------------------------------------|---|-----------------------|----------------------------------------|---|-----------------------|
| $p < 5 \times 10^{-3}$<br>(8402 SNPs)  |   |                       | $p < 5 \times 10^{-3}$<br>(2616 SNPs)  |   |                       |
| BD                                     | - | 0.036                 |                                        | - | $5.9 \times 10^{-3}$  |
| CHD                                    | + | 0.36                  |                                        | - | 0.49                  |
| HT                                     | + | 0.20                  |                                        | - | 0.70                  |
| CD                                     | + | 0.46                  |                                        | + | 0.96                  |
| RA                                     | + | 0.50                  |                                        | - | 0.090                 |
| T1D                                    | - | 0.90                  |                                        | - | 0.084                 |
| T2D                                    | + | $1.3 \times 10^{-13}$ |                                        | + | $2.6 \times 10^{-11}$ |
|                                        |   |                       |                                        |   |                       |
| $p < 5 \times 10^{-2}$<br>(36921 SNPs) |   |                       | $p < 5 \times 10^{-2}$<br>(12262 SNPs) |   |                       |
| BD                                     | - | 0.013                 |                                        | - | 0.016                 |
| CHD                                    | + | 0.20                  |                                        | + | 0.90                  |
| HT                                     | + | 0.58                  |                                        | - | 0.23                  |
| CD                                     | + | 0.30                  |                                        | + | 0.60                  |
| RA                                     | + | 0.78                  |                                        | - | 0.040                 |
| T1D                                    | + | 0.98                  |                                        | - | 0.31                  |
| T2D                                    | + | $< 2 \times 10^{-16}$ |                                        | + | $7.7 \times 10^{-14}$ |
|                                        |   |                       |                                        |   |                       |
| $p < 0.1$<br>(60232 SNPs)              |   |                       | $p < 0.1$<br>(19981 SNPs)              |   |                       |
| BD                                     | - | $8.6 \times 10^{-3}$  |                                        | - | 0.045                 |
| CHD                                    | + | 0.28                  |                                        | + | 0.86                  |
| HT                                     | + | 0.90                  |                                        | - | 0.16                  |
| CD                                     | + | 0.34                  |                                        | + | 0.32                  |
| RA                                     | - | 0.89                  |                                        | - | 0.015                 |
| T1D                                    | - | 0.87                  |                                        | - | 0.54                  |
| T2D                                    | + | $3.3 \times 10^{-16}$ |                                        | + | $3.0 \times 10^{-13}$ |

|                        |   |                      |                       |   |                       |
|------------------------|---|----------------------|-----------------------|---|-----------------------|
|                        |   |                      |                       |   |                       |
| p<0.2<br>(101903 SNPs) |   |                      | p<0.2<br>(33221 SNPs) |   |                       |
| BD                     | - | 0.025                |                       | - | 0.26                  |
| CHD                    | + | 0.34                 |                       | + | 0.40                  |
| HT                     | - | 0.98                 |                       | - | 0.26                  |
| CD                     | + | 0.58                 |                       | + | 0.55                  |
| RA                     | - | 0.58                 |                       | - | 0.048                 |
| T1D                    | - | 0.97                 |                       | - | 0.82                  |
| T2D                    | + | <2x10 <sup>-16</sup> |                       | + | 4.3x10 <sup>-16</sup> |
|                        |   |                      |                       |   |                       |
| p<0.3<br>(140135 SNPs) |   |                      | p<0.3<br>(44576 SNPs) |   |                       |
| BD                     | - | 0.030                |                       | - | 0.32                  |
| CHD                    | + | 0.34                 |                       | + | 0.45                  |
| HT                     | - | 0.99                 |                       | - | 0.26                  |
| CD                     | + | 0.59                 |                       | + | 0.35                  |
| RA                     | - | 0.37                 |                       | - | 0.039                 |
| T1D                    | + | 0.96                 |                       | - | 0.87                  |
| T2D                    | + | <2x10 <sup>-16</sup> |                       | + | <2e-16                |
|                        |   |                      |                       |   |                       |
| p<0.4<br>(176024 SNPs) |   |                      | p<0.4<br>(54639 SNPs) |   |                       |
| BD                     | - | 0.046                |                       | - | 0.39                  |
| CHD                    | + | 0.33                 |                       | + | 0.47                  |
| HT                     | + | 0.95                 |                       | - | 0.26                  |
| CD                     | + | 0.73                 |                       | + | 0.36                  |
| RA                     | - | 0.31                 |                       | - | 0.036                 |
| T1D                    | + | 0.88                 |                       | + | 0.99                  |

|                        |   |                      |                       |   |                       |
|------------------------|---|----------------------|-----------------------|---|-----------------------|
| T2D                    | + | $<2 \times 10^{-16}$ |                       | + | $<2 \times 10^{-16}$  |
|                        |   |                      |                       |   |                       |
| p<0.5<br>(210612 SNPs) |   |                      | p<0.5<br>(63660 SNPs) |   |                       |
| BD                     | - | 0.050                |                       | - | 0.35                  |
| CHD                    | + | 0.31                 |                       | + | 0.47                  |
| HT                     | - | 0.87                 |                       | - | 0.10                  |
| CD                     | + | 0.79                 |                       | + | 0.43                  |
| RA                     | - | 0.22                 |                       | - | 0.018                 |
| T1D                    | + | 0.85                 |                       | - | 0.98                  |
| T2D                    | + | $<2 \times 10^{-16}$ |                       | + | $9.0 \times 10^{-16}$ |
|                        |   |                      |                       |   |                       |
| p<0.6<br>(244122 SNPs) |   |                      | p<0.6<br>(71794 SNPs) |   |                       |
| BD                     | - | 0.052                |                       | - | 0.34                  |
| CHD                    | + | 0.31                 |                       | + | 0.51                  |
| HT                     | - | 0.82                 |                       | - | 0.10                  |
| CD                     | + | 0.86                 |                       | + | 0.45                  |
| RA                     | - | 0.20                 |                       | - | 0.017                 |
| T1D                    | + | 0.81                 |                       | + | 0.97                  |
| T2D                    | + | $<2 \times 10^{-16}$ |                       | + | $1.8 \times 10^{-15}$ |
|                        |   |                      |                       |   |                       |
| p<0.7<br>(277294 SNPs) |   |                      | p<0.7<br>(78949 SNPs) |   |                       |
| BD                     | - | 0.057                |                       | - | 0.28                  |
| CHD                    | + | 0.31                 |                       | + | 0.49                  |
| HT                     | - | 0.79                 |                       | - | 0.11                  |
| CD                     | + | 0.89                 |                       | + | 0.43                  |
| RA                     | - | 0.19                 |                       | - | 0.018                 |

|                        |   |                      |                       |   |                       |
|------------------------|---|----------------------|-----------------------|---|-----------------------|
| T1D                    | + | 0.88                 |                       | - | 0.92                  |
| T2D                    | + | $<2 \times 10^{-16}$ |                       | + | $3.5 \times 10^{-15}$ |
|                        |   |                      |                       |   |                       |
| p<0.8<br>(309981 SNPs) |   |                      | p<0.8<br>(85243 SNPs) |   |                       |
| BD                     | - | 0.051                |                       | - | 0.25                  |
| CHD                    | + | 0.34                 |                       | + | 0.54                  |
| HT                     | - | 0.78                 |                       | - | 0.11                  |
| CD                     | + | 0.98                 |                       | + | 0.47                  |
| RA                     | - | 0.18                 |                       | - | 0.016                 |
| T1D                    | + | 0.95                 |                       | - | 0.85                  |
| T2D                    | + | $<2 \times 10^{-16}$ |                       | + | $5.5 \times 10^{-15}$ |
|                        |   |                      |                       |   |                       |
| p<0.9<br>(342383 SNPs) |   |                      | p<0.9<br>(90741 SNPs) |   |                       |
| BD                     | - | 0.052                |                       | - | 0.25                  |
| CHD                    | + | 0.37                 |                       | + | 0.56                  |
| HT                     | - | 0.76                 |                       | - | 0.11                  |
| CD                     | - | 0.98                 |                       | + | 0.50                  |
| RA                     | - | 0.18                 |                       | - | 0.016                 |
| T1D                    | + | 0.97                 |                       | - | 0.82                  |
| T2D                    | + | $<2 \times 10^{-16}$ |                       | + | $9.8 \times 10^{-15}$ |
|                        |   |                      |                       |   |                       |
| All<br>(392249 SNPs)   |   |                      | All<br>(95177 SNPs)   |   |                       |
| BD                     | - | 0.051                |                       | - | 0.25                  |
| CHD                    | + | 0.37                 |                       | + | 0.56                  |
| HT                     | - | 0.76                 |                       | - | 0.11                  |
| CD                     | - | 0.97                 |                       | + | 0.50                  |

|     |   |                      |  |   |                       |
|-----|---|----------------------|--|---|-----------------------|
| RA  | - | 0.18                 |  | - | 0.016                 |
| T1D | + | 0.97                 |  | - | 0.82                  |
| T2D | + | $<2 \times 10^{-16}$ |  | + | $8.9 \times 10^{-15}$ |
