# Supplementary material for: Mining the Human Phenome Using Allelic Scores That Index Biological Intermediates
Source: PubMed Central journal article supplement (PMC3814299; doi:10.1371/journal.pgen.1003919), 2013-10-31
Supplement: pgen.1003919.s014.pdf [file pgen.1003919.s014.pdf]

**Table S5. Association between case-control status in the WTCCC and an LD pruned allelic score that proxies for CRP.** The left hand side of the table shows results for a weighted allelic score consisting of all SNPs that meet a certain threshold (“All SNPs”), whilst the right side shows results for a weighted allelic score that has been pruned for LD (“Thinned Set”). Results are shown for seventeen different p value thresholds and the number of SNPs that went into construction of the score for each threshold is listed also. Results are shown for seven different diseases. BD = Bipolar Disorder; CHD = Coronary Heart Disease; HT = Hypertension; CD = Crohn’s Disease; RA = Rheumatoid Arthritis; T1D = Type 1 Diabetes; T2D = Type 2 Diabetes; Dir = Direction of effect; Pval = P value.

| All SNPs                             |     |       | Thinned Set                         |     |                      |
|--------------------------------------|-----|-------|-------------------------------------|-----|----------------------|
|                                      | Dir | Pval  |                                     | Dir | Pval                 |
| $p < 5 \times 10^{-8}$<br>(152 SNPs) |     |       | $p < 5 \times 10^{-8}$<br>(40 SNPs) |     |                      |
| BD                                   | +   | 0.11  |                                     | +   | 0.060                |
| CHD                                  | +   | 0.80  |                                     | -   | 0.71                 |
| HT                                   | +   | 0.23  |                                     | +   | 0.44                 |
| CD                                   | +   | 0.051 |                                     | +   | $9.0 \times 10^{-3}$ |
| RA                                   | +   | 0.028 |                                     | +   | 0.13                 |
| T1D                                  | +   | 0.15  |                                     | +   | 0.18                 |
| T2D                                  | +   | 0.50  |                                     | +   | 0.23                 |
|                                      |     |       |                                     |     |                      |
| $p < 5 \times 10^{-7}$<br>(184 SNPs) |     |       | $p < 5 \times 10^{-7}$<br>(46 SNPs) |     |                      |
| BD                                   | +   | 0.086 |                                     | +   | 0.041                |
| CHD                                  | +   | 0.63  |                                     | -   | 0.89                 |
| HT                                   | +   | 0.15  |                                     | +   | 0.42                 |
| CD                                   | +   | 0.031 |                                     | +   | $5.0 \times 10^{-3}$ |
| RA                                   | +   | 0.023 |                                     | +   | 0.11                 |
| T1D                                  | +   | 0.080 |                                     | +   | 0.16                 |
| T2D                                  | +   | 0.32  |                                     | +   | 0.15                 |
|                                      |     |       |                                     |     |                      |
| $p < 5 \times 10^{-6}$               |     |       | $p < 5 \times 10^{-6}$              |     |                      |

|                                      |   |                      |                                      |   |                      |
|--------------------------------------|---|----------------------|--------------------------------------|---|----------------------|
| (262 SNPs)                           |   |                      | (70 SNPs)                            |   |                      |
| BD                                   | + | 0.12                 |                                      | + | 0.031                |
| CHD                                  | + | 0.43                 |                                      | + | 0.80                 |
| HT                                   | + | 0.17                 |                                      | + | 0.31                 |
| CD                                   | + | 0.048                |                                      | + | $5.7 \times 10^{-3}$ |
| RA                                   | + | 0.011                |                                      | + | 0.042                |
| T1D                                  | + | 0.068                |                                      | + | 0.16                 |
| T2D                                  | + | 0.19                 |                                      | + | 0.065                |
|                                      |   |                      |                                      |   |                      |
| $p < 5 \times 10^{-5}$<br>(388 SNPs) |   |                      | $p < 5 \times 10^{-5}$<br>(107 SNPs) |   |                      |
| BD                                   | + | 0.15                 |                                      | + | 0.027                |
| CHD                                  | + | 0.36                 |                                      | + | 0.68                 |
| HT                                   | + | 0.21                 |                                      | + | 0.29                 |
| CD                                   | + | 0.016                |                                      | + | $2.9 \times 10^{-3}$ |
| RA                                   | + | $3.0 \times 10^{-3}$ |                                      | + | $9.1 \times 10^{-3}$ |
| T1D                                  | + | 0.077                |                                      | + | 0.098                |
| T2D                                  | + | 0.055                |                                      | + | 0.058                |
|                                      |   |                      |                                      |   |                      |
| $p < 5 \times 10^{-4}$<br>(911 SNPs) |   |                      | $p < 5 \times 10^{-4}$<br>(306 SNPs) |   |                      |
| BD                                   | + | 0.083                |                                      | + | 0.023                |
| CHD                                  | + | 0.15                 |                                      | + | 0.32                 |
| HT                                   | + | 0.085                |                                      | + | 0.33                 |
| CD                                   | + | $4.3 \times 10^{-3}$ |                                      | + | $5.0 \times 10^{-3}$ |
| RA                                   | + | $6.5 \times 10^{-4}$ |                                      | + | $2.7 \times 10^{-3}$ |
| T1D                                  | + | 0.056                |                                      | + | 0.035                |
| T2D                                  | + | $9.5 \times 10^{-3}$ |                                      | + | 0.050                |
|                                      |   |                      |                                      |   |                      |

|                                        |   |                      |                                       |   |                      |
|----------------------------------------|---|----------------------|---------------------------------------|---|----------------------|
| $p < 5 \times 10^{-3}$<br>(3798 SNPs)  |   |                      | $p < 5 \times 10^{-3}$<br>(1516 SNPs) |   |                      |
| BD                                     | + | 0.093                |                                       | + | 0.020                |
| CHD                                    | + | 0.033                |                                       | + | 0.024                |
| HT                                     | + | 0.073                |                                       | + | 0.094                |
| CD                                     | + | $2.2 \times 10^{-3}$ |                                       | + | 0.016                |
| RA                                     | + | $7.6 \times 10^{-4}$ |                                       | + | $3.3 \times 10^{-3}$ |
| T1D                                    | + | 0.038                |                                       | + | 0.039                |
| T2D                                    | + | $1.4 \times 10^{-3}$ |                                       | + | $2.7 \times 10^{-3}$ |
|                                        |   |                      |                                       |   |                      |
| $p < 5 \times 10^{-2}$<br>(24159 SNPs) |   |                      | $p < 5 \times 10^{-2}$<br>(9597 SNPs) |   |                      |
| BD                                     | + | 0.15                 |                                       | + | 0.26                 |
| CHD                                    | + | 0.021                |                                       | + | 0.034                |
| HT                                     | + | 0.12                 |                                       | + | 0.40                 |
| CD                                     | + | $8.3 \times 10^{-4}$ |                                       | + | 0.012                |
| RA                                     | + | $8.4 \times 10^{-3}$ |                                       | + | 0.056                |
| T1D                                    | + | 0.046                |                                       | + | 0.081                |
| T2D                                    | + | $4.1 \times 10^{-5}$ |                                       | + | $2.4 \times 10^{-3}$ |
|                                        |   |                      |                                       |   |                      |
| $p < 0.1$<br>(44677 SNPs)              |   |                      | $p < 0.1$<br>(17090 SNPs)             |   |                      |
| BD                                     | + | 0.12                 |                                       | + | 0.23                 |
| CHD                                    | + | $8.9 \times 10^{-3}$ |                                       | + | 0.011                |
| HT                                     | + | 0.13                 |                                       | + | 0.33                 |
| CD                                     | + | $3.0 \times 10^{-4}$ |                                       | + | $5.1 \times 10^{-3}$ |
| RA                                     | + | 0.014                |                                       | + | 0.10                 |
| T1D                                    | + | 0.023                |                                       | + | 0.067                |
| T2D                                    | + | $2.6 \times 10^{-6}$ |                                       | + | $1.8 \times 10^{-4}$ |

|                        |   |                      |                       |   |                      |
|------------------------|---|----------------------|-----------------------|---|----------------------|
|                        |   |                      |                       |   |                      |
| p<0.2<br>(83740 SNPs)  |   |                      | p<0.2<br>(30165 SNPs) |   |                      |
| BD                     | + | 0.14                 |                       | + | 0.31                 |
| CHD                    | + | $7.3 \times 10^{-3}$ |                       | + | 0.021                |
| HT                     | + | 0.18                 |                       | + | 0.44                 |
| CD                     | + | $2.3 \times 10^{-4}$ |                       | + | $4.1 \times 10^{-3}$ |
| RA                     | + | 0.083                |                       | + | 0.33                 |
| T1D                    | + | 0.012                |                       | + | 0.12                 |
| T2D                    | + | $1.0 \times 10^{-6}$ |                       | + | $3.9 \times 10^{-5}$ |
|                        |   |                      |                       |   |                      |
| p<0.3<br>(121099 SNPs) |   |                      | p<0.3<br>(41759 SNPs) |   |                      |
| BD                     | + | 0.25                 |                       | + | 0.65                 |
| CHD                    | + | 0.018                |                       | + | 0.049                |
| HT                     | + | 0.24                 |                       | + | 0.72                 |
| CD                     | + | $6.9 \times 10^{-4}$ |                       | + | $9.3 \times 10^{-3}$ |
| RA                     | + | 0.14                 |                       | + | 0.59                 |
| T1D                    | + | 0.017                |                       | + | 0.18                 |
| T2D                    | + | $8.6 \times 10^{-7}$ |                       | + | $6.5 \times 10^{-5}$ |
|                        |   |                      |                       |   |                      |
| p<0.4<br>(157932 SNPs) |   |                      | p<0.4<br>(52202 SNPs) |   |                      |
| BD                     | + | 0.31                 |                       | + | 0.77                 |
| CHD                    | + | 0.028                |                       | + | 0.046                |
| HT                     | + | 0.25                 |                       | + | 0.67                 |
| CD                     | + | $6.0 \times 10^{-4}$ |                       | + | $3.1 \times 10^{-3}$ |
| RA                     | + | 0.17                 |                       | + | 0.78                 |
| T1D                    | + | 0.021                |                       | + | 0.097                |

|                        |   |                      |                       |   |                      |
|------------------------|---|----------------------|-----------------------|---|----------------------|
| T2D                    | + | $6.0 \times 10^{-7}$ |                       | + | $6.9 \times 10^{-5}$ |
|                        |   |                      |                       |   |                      |
| p<0.5<br>(194853 SNPs) |   |                      | p<0.5<br>(61963 SNPs) |   |                      |
| BD                     | + | 0.36                 |                       | + | 0.80                 |
| CHD                    | + | 0.028                |                       | + | 0.046                |
| HT                     | + | 0.23                 |                       | + | 0.73                 |
| CD                     | + | $5.0 \times 10^{-4}$ |                       | + | $3.6 \times 10^{-3}$ |
| RA                     | + | 0.17                 |                       | + | 0.85                 |
| T1D                    | + | 0.017                |                       | + | 0.14                 |
| T2D                    | + | $2.1 \times 10^{-7}$ |                       | + | $6.3 \times 10^{-5}$ |
|                        |   |                      |                       |   |                      |
| p<0.6<br>(231075 SNPs) |   |                      | p<0.6<br>(70578 SNPs) |   |                      |
| BD                     | + | 0.36                 |                       | + | 0.84                 |
| CHD                    | + | 0.026                |                       | + | 0.054                |
| HT                     | + | 0.22                 |                       | + | 0.73                 |
| CD                     | + | $4.8 \times 10^{-4}$ |                       | + | $5.1 \times 10^{-3}$ |
| RA                     | + | 0.18                 |                       | + | 0.91                 |
| T1D                    | + | 0.019                |                       | + | 0.13                 |
| T2D                    | + | $1.4 \times 10^{-7}$ |                       | + | $6.8 \times 10^{-5}$ |
|                        |   |                      |                       |   |                      |
| p<0.7<br>(267164 SNPs) |   |                      | p<0.7<br>(78187 SNPs) |   |                      |
| BD                     | + | 0.36                 |                       | + | 0.82                 |
| CHD                    | + | 0.028                |                       | + | 0.047                |
| HT                     | + | 0.20                 |                       | + | 0.71                 |
| CD                     | + | $4.0 \times 10^{-4}$ |                       | + | $4.3 \times 10^{-3}$ |
| RA                     | + | 0.17                 |                       | + | 0.88                 |

|                        |   |                      |                       |   |                      |
|------------------------|---|----------------------|-----------------------|---|----------------------|
| T1D                    | + | 0.018                |                       | + | 0.13                 |
| T2D                    | + | $8.5 \times 10^{-8}$ |                       | + | $4.8 \times 10^{-5}$ |
|                        |   |                      |                       |   |                      |
| p<0.8<br>(303012 SNPs) |   |                      | p<0.8<br>(85017 SNPs) |   |                      |
| BD                     | + | 0.38                 |                       | + | 0.89                 |
| CHD                    | + | 0.028                |                       | + | 0.051                |
| HT                     | + | 0.20                 |                       | + | 0.77                 |
| CD                     | + | $3.4 \times 10^{-4}$ |                       | + | $4.4 \times 10^{-3}$ |
| RA                     | + | 0.17                 |                       | + | 0.93                 |
| T1D                    | + | 0.019                |                       | + | 0.16                 |
| T2D                    | + | $8.4 \times 10^{-8}$ |                       | + | $7.4 \times 10^{-5}$ |
|                        |   |                      |                       |   |                      |
| p<0.9<br>(339088 SNPs) |   |                      | p<0.9<br>(90632 SNPs) |   |                      |
| BD                     | + | 0.37                 |                       | + | 0.86                 |
| CHD                    | + | 0.028                |                       | + | 0.051                |
| HT                     | + | 0.20                 |                       | + | 0.75                 |
| CD                     | + | $3.0 \times 10^{-4}$ |                       | + | $4.1 \times 10^{-3}$ |
| RA                     | + | 0.18                 |                       | + | 0.92                 |
| T1D                    | + | 0.020                |                       | + | 0.16                 |
| T2D                    | + | $8.2 \times 10^{-8}$ |                       | + | $6.8 \times 10^{-5}$ |
|                        |   |                      |                       |   |                      |
| All<br>(375099 SNPs)   |   |                      | All<br>(95090 SNPs)   |   |                      |
| BD                     | + | 0.37                 |                       | + | 0.85                 |
| CHD                    | + | 0.028                |                       | + | 0.050                |
| HT                     | + | 0.20                 |                       | + | 0.75                 |
| CD                     | + | $2.9 \times 10^{-4}$ |                       | + | $4.0 \times 10^{-3}$ |

|     |   |                      |  |   |                      |
|-----|---|----------------------|--|---|----------------------|
| RA  | + | 0.17                 |  | + | 0.91                 |
| T1D | + | 0.020                |  | + | 0.15                 |
| T2D | + | $7.6 \times 10^{-8}$ |  | + | $6.4 \times 10^{-5}$ |
