# Supplementary material for: Mining the Human Phenome Using Allelic Scores That Index Biological Intermediates
Source: PubMed Central journal article supplement (PMC3814299; doi:10.1371/journal.pgen.1003919), 2013-10-31
Supplement: pgen.1003919.s015.pdf [file pgen.1003919.s015.pdf]

**Table S6. Association between case-control status in the WTCCC and an LD pruned allelic score that proxies for LDLc.**

The left hand side of the table shows results for a weighted allelic score consisting of all SNPs that meet a certain threshold (“All SNPs”), whilst the right side shows results for a weighted allelic score that has been pruned for LD (“Thinned Set”). Results are shown for seventeen different p value thresholds and the number of SNPs that went into construction of the score for each threshold is listed also. Results are shown for seven different diseases. BD = Bipolar Disorder; CHD = Coronary Heart Disease; HT = Hypertension; CD = Crohn’s Disease; RA = Rheumatoid Arthritis; T1D = Type 1 Diabetes; T2D = Type 2 Diabetes; Dir = Direction of effect; Pval = P value.

|                                      | All SNPs |                      |                                     | Thinned Set |                      |
|--------------------------------------|----------|----------------------|-------------------------------------|-------------|----------------------|
|                                      | Dir      | Pval                 |                                     | Dir         | Pval                 |
| $p < 5 \times 10^{-8}$<br>(251 SNPs) |          |                      | $p < 5 \times 10^{-8}$<br>(72 SNPs) |             |                      |
| BD                                   | -        | 0.88                 |                                     | -           | 0.32                 |
| CHD                                  | +        | $9.2 \times 10^{-3}$ |                                     | +           | $2.3 \times 10^{-8}$ |
| HT                                   | -        | 0.75                 |                                     | -           | 0.27                 |
| CD                                   | -        | 0.76                 |                                     | -           | 0.37                 |
| RA                                   | -        | 0.25                 |                                     | -           | 0.066                |
| T1D                                  | +        | 0.58                 |                                     | +           | 0.77                 |
| T2D                                  | -        | 0.12                 |                                     | -           | $7.7 \times 10^{-3}$ |
|                                      |          |                      |                                     |             |                      |
| $p < 5 \times 10^{-7}$<br>(310 SNPs) |          |                      | $p < 5 \times 10^{-7}$<br>(89 SNPs) |             |                      |
| BD                                   | -        | 0.98                 |                                     | -           | 0.46                 |
| CHD                                  | +        | $7.5 \times 10^{-3}$ |                                     | +           | $2.5 \times 10^{-9}$ |
| HT                                   | -        | 0.73                 |                                     | -           | 0.42                 |
| CD                                   | -        | 0.79                 |                                     | -           | 0.48                 |
| RA                                   | -        | 0.26                 |                                     | -           | 0.16                 |
| T1D                                  | +        | 0.47                 |                                     | +           | 0.74                 |
| T2D                                  | -        | 0.11                 |                                     | -           | 0.014                |
|                                      |          |                      |                                     |             |                      |
| $p < 5 \times 10^{-6}$               |          |                      | $p < 5 \times 10^{-6}$              |             |                      |

|                                       |   |                      |                                      |   |                      |
|---------------------------------------|---|----------------------|--------------------------------------|---|----------------------|
| (417 SNPs)                            |   |                      | (121 SNPs)                           |   |                      |
| BD                                    | + | 0.98                 |                                      | - | 0.64                 |
| CHD                                   | + | $5.7 \times 10^{-3}$ |                                      | + | $2.8 \times 10^{-8}$ |
| HT                                    | - | 0.68                 |                                      | - | 0.29                 |
| CD                                    | - | 0.96                 |                                      | - | 0.81                 |
| RA                                    | - | 0.24                 |                                      | - | 0.17                 |
| T1D                                   | + | 0.70                 |                                      | - | 0.24                 |
| T2D                                   | - | 0.11                 |                                      | - | 0.033                |
|                                       |   |                      |                                      |   |                      |
| $p < 5 \times 10^{-5}$<br>(647 SNPs)  |   |                      | $p < 5 \times 10^{-5}$<br>(184 SNPs) |   |                      |
| BD                                    | - | 0.87                 |                                      | - | 0.51                 |
| CHD                                   | + | $6.4 \times 10^{-3}$ |                                      | + | $1.5 \times 10^{-8}$ |
| HT                                    | - | 0.34                 |                                      | - | 0.19                 |
| CD                                    | + | 0.84                 |                                      | - | 0.68                 |
| RA                                    | - | 0.21                 |                                      | - | 0.083                |
| T1D                                   | - | 0.86                 |                                      | - | 0.13                 |
| T2D                                   | - | 0.22                 |                                      | - | 0.087                |
|                                       |   |                      |                                      |   |                      |
| $p < 5 \times 10^{-4}$<br>(1138 SNPs) |   |                      | $p < 5 \times 10^{-4}$<br>(360 SNPs) |   |                      |
| BD                                    | - | 0.97                 |                                      | - | 0.47                 |
| CHD                                   | + | $1.5 \times 10^{-3}$ |                                      | + | $5.3 \times 10^{-9}$ |
| HT                                    | - | 0.48                 |                                      | - | 0.23                 |
| CD                                    | + | 0.45                 |                                      | - | 0.99                 |
| RA                                    | - | 0.38                 |                                      | - | 0.18                 |
| T1D                                   | - | 0.64                 |                                      | - | 0.13                 |
| T2D                                   | - | 0.60                 |                                      | - | 0.28                 |
|                                       |   |                      |                                      |   |                      |

|                                      |   |                      |                                     |   |                      |
|--------------------------------------|---|----------------------|-------------------------------------|---|----------------------|
| p<5x10 <sup>-3</sup><br>(3635 SNPs)  |   |                      | p<5x10 <sup>-3</sup><br>(1349 SNPs) |   |                      |
| BD                                   | - | 0.30                 |                                     | - | 0.21                 |
| CHD                                  | + | 1.4x10 <sup>-3</sup> |                                     | + | 8.9x10 <sup>-8</sup> |
| HT                                   | - | 0.21                 |                                     | - | 0.22                 |
| CD                                   | + | 0.63                 |                                     | + | 0.66                 |
| RA                                   | - | 0.19                 |                                     | - | 0.043                |
| T1D                                  | - | 0.011                |                                     | - | 0.028                |
| T2D                                  | - | 0.88                 |                                     | + | 0.98                 |
|                                      |   |                      |                                     |   |                      |
| p<5x10 <sup>-2</sup><br>(21431 SNPs) |   |                      | p<5x10 <sup>-2</sup><br>(8312 SNPs) |   |                      |
| BD                                   | - | 0.34                 |                                     | - | 0.18                 |
| CHD                                  | + | 1.2x10 <sup>-4</sup> |                                     | + | 5.0x10 <sup>-8</sup> |
| HT                                   | - | 0.062                |                                     | - | 0.10                 |
| CD                                   | + | 0.83                 |                                     | + | 0.60                 |
| RA                                   | - | 0.30                 |                                     | - | 0.24                 |
| T1D                                  | - | 0.092                |                                     | - | 0.54                 |
| T2D                                  | + | 0.31                 |                                     | + | 0.42                 |
|                                      |   |                      |                                     |   |                      |
| p<0.1<br>(40201 SNPs)                |   |                      | p<0.1<br>(15147 SNPs)               |   |                      |
| BD                                   | - | 0.15                 |                                     | - | 0.14                 |
| CHD                                  | + | 1.8x10 <sup>-4</sup> |                                     | + | 8.2x10 <sup>-8</sup> |
| HT                                   | - | 0.034                |                                     | - | 0.070                |
| CD                                   | + | 0.96                 |                                     | + | 0.73                 |
| RA                                   | - | 0.33                 |                                     | - | 0.35                 |
| T1D                                  | - | 0.026                |                                     | - | 0.12                 |
| T2D                                  | + | 0.38                 |                                     | + | 0.44                 |

|                        |   |                      |                       |   |                      |
|------------------------|---|----------------------|-----------------------|---|----------------------|
|                        |   |                      |                       |   |                      |
| p<0.2<br>(77137 SNPs)  |   |                      | p<0.2<br>(27540 SNPs) |   |                      |
| BD                     | - | 0.15                 |                       | - | 0.071                |
| CHD                    | + | 2.1x10 <sup>-4</sup> |                       | + | 1.5x10 <sup>-7</sup> |
| HT                     | - | 0.031                |                       | - | 0.17                 |
| CD                     | - | 0.96                 |                       | - | 0.99                 |
| RA                     | - | 0.44                 |                       | - | 0.48                 |
| T1D                    | - | 0.031                |                       | - | 0.15                 |
| T2D                    | + | 0.40                 |                       | + | 0.43                 |
|                        |   |                      |                       |   |                      |
| p<0.3<br>(114252 SNPs) |   |                      | p<0.3<br>(39181 SNPs) |   |                      |
| BD                     | - | 0.10                 |                       | - | 0.067                |
| CHD                    | + | 5.0x10 <sup>-4</sup> |                       | + | 5.1x10 <sup>-7</sup> |
| HT                     | - | 0.018                |                       | - | 0.10                 |
| CD                     | - | 0.88                 |                       | - | 0.73                 |
| RA                     | - | 0.45                 |                       | - | 0.30                 |
| T1D                    | - | 0.049                |                       | - | 0.16                 |
| T2D                    | + | 0.55                 |                       | + | 0.62                 |
|                        |   |                      |                       |   |                      |
| p<0.4<br>(151402 SNPs) |   |                      | p<0.4<br>(49666 SNPs) |   |                      |
| BD                     | - | 0.057                |                       | - | 0.10                 |
| CHD                    | + | 5.9x10 <sup>-4</sup> |                       | + | 1.1x10 <sup>-6</sup> |
| HT                     | - | 0.012                |                       | - | 0.091                |
| CD                     | - | 0.76                 |                       | - | 0.78                 |
| RA                     | - | 0.37                 |                       | - | 0.27                 |
| T1D                    | - | 0.041                |                       | - | 0.13                 |

|                        |   |                      |                       |   |                      |
|------------------------|---|----------------------|-----------------------|---|----------------------|
| T2D                    | + | 0.64                 |                       | + | 0.66                 |
|                        |   |                      |                       |   |                      |
| p<0.5<br>(188909 SNPs) |   |                      | p<0.5<br>(59533 SNPs) |   |                      |
| BD                     | - | 0.064                |                       | - | 0.071                |
| CHD                    | + | $7.2 \times 10^{-4}$ |                       | + | $3.2 \times 10^{-6}$ |
| HT                     | - | 0.011                |                       | - | 0.088                |
| CD                     | - | 0.77                 |                       | - | 0.75                 |
| RA                     | - | 0.32                 |                       | - | 0.28                 |
| T1D                    | - | 0.035                |                       | - | 0.085                |
| T2D                    | + | 0.61                 |                       | + | 0.76                 |
|                        |   |                      |                       |   |                      |
| p<0.6<br>(226525 SNPs) |   |                      | p<0.6<br>(68349 SNPs) |   |                      |
| BD                     | - | 0.057                |                       | - | 0.043                |
| CHD                    | + | $1.1 \times 10^{-3}$ |                       | + | $7.3 \times 10^{-6}$ |
| HT                     | - | $9.1 \times 10^{-3}$ |                       | - | 0.067                |
| CD                     | - | 0.74                 |                       | - | 0.73                 |
| RA                     | - | 0.32                 |                       | - | 0.21                 |
| T1D                    | - | 0.023                |                       | - | 0.046                |
| T2D                    | + | 0.64                 |                       | + | 0.82                 |
|                        |   |                      |                       |   |                      |
| p<0.7<br>(263835 SNPs) |   |                      | p<0.7<br>(76173 SNPs) |   |                      |
| BD                     | - | 0.051                |                       | - | 0.044                |
| CHD                    | + | $1.3 \times 10^{-3}$ |                       | + | $5.2 \times 10^{-6}$ |
| HT                     | - | $8.9 \times 10^{-3}$ |                       | - | 0.079                |
| CD                     | - | 0.72                 |                       | - | 0.82                 |
| RA                     | - | 0.30                 |                       | - | 0.23                 |

|                        |   |                      |                       |   |                      |
|------------------------|---|----------------------|-----------------------|---|----------------------|
| T1D                    | - | 0.019                |                       | - | 0.048                |
| T2D                    | + | 0.67                 |                       | + | 0.71                 |
|                        |   |                      |                       |   |                      |
| p<0.8<br>(301224 SNPs) |   |                      | p<0.8<br>(83110 SNPs) |   |                      |
| BD                     | - | 0.051                |                       | - | 0.031                |
| CHD                    | + | $1.4 \times 10^{-3}$ |                       | + | $5.5 \times 10^{-6}$ |
| HT                     | - | $9.9 \times 10^{-3}$ |                       | - | 0.068                |
| CD                     | - | 0.70                 |                       | - | 0.74                 |
| RA                     | - | 0.29                 |                       | - | 0.20                 |
| T1D                    | - | 0.020                |                       | - | 0.038                |
| T2D                    | + | 0.66                 |                       | + | 0.75                 |
|                        |   |                      |                       |   |                      |
| p<0.9<br>(338229 SNPs) |   |                      | p<0.9<br>(88950 SNPs) |   |                      |
| BD                     | - | 0.047                |                       | - | 0.028                |
| CHD                    | + | $1.5 \times 10^{-3}$ |                       | + | $5.4 \times 10^{-6}$ |
| HT                     | - | 0.011                |                       | - | 0.075                |
| CD                     | - | 0.69                 |                       | - | 0.73                 |
| RA                     | - | 0.28                 |                       | - | 0.20                 |
| T1D                    | - | 0.019                |                       | - | 0.038                |
| T2D                    | + | 0.65                 |                       | + | 0.71                 |
|                        |   |                      |                       |   |                      |
| All<br>(375112 SNPs)   |   |                      | All<br>(93626 SNPs)   |   |                      |
| BD                     | - | 0.049                |                       | - | 0.025                |
| CHD                    | + | $1.7 \times 10^{-3}$ |                       | + | $5.9 \times 10^{-6}$ |
| HT                     | - | 0.011                |                       | - | 0.070                |
| CD                     | - | 0.73                 |                       | - | 0.72                 |

|     |   |       |  |   |       |
|-----|---|-------|--|---|-------|
| RA  | - | 0.26  |  | - | 0.18  |
| T1D | - | 0.018 |  | - | 0.034 |
| T2D | + | 0.66  |  | + | 0.73  |
