# Supplementary material for: Mining the Human Phenome Using Allelic Scores That Index Biological Intermediates
Source: PubMed Central journal article supplement (PMC3814299; doi:10.1371/journal.pgen.1003919), 2013-10-31
Supplement: pgen.1003919.s017.pdf [file pgen.1003919.s017.pdf]

**Table S8. Known SNPs contributing to the calculation of BMI, LDLc, and CRP allelic scores in QIMR twins replication set.**  
The first seven columns refer to results from published meta-analyses, whereas the last three columns refer to association in the QIMR twins replication set.

| Variable | SNP        | Chromosome | Position  | Putative Gene         | Effect Allele | Effect size | QIMR RQSR <sup>3</sup> | QIMR pvalue          | QIMR RSQ <sup>4</sup> |
|----------|------------|------------|-----------|-----------------------|---------------|-------------|------------------------|----------------------|-----------------------|
| BMI      | rs2815752  | 1          | 72585028  | <i>NEGR1</i>          | A             | 0.13        | 0.9995                 | 0.63                 | 0.00%                 |
| BMI      | rs1514175  | 1          | 74764232  | <i>TNNI3K</i>         | A             | 0.07        | 0.9752                 | 0.91                 | 0.00%                 |
| BMI      | rs1555543  | 1          | 96717385  | <i>PTBP2</i>          | C             | 0.06        | 0.9973                 | 0.73                 | 0.00%                 |
| BMI      | rs543874   | 1          | 176156103 | <i>SEC16B</i>         | G             | 0.22        | 0.9881                 | 0.051                | 0.05%                 |
| BMI      | rs2867125  | 2          | 612827    | <i>TMEM18</i>         | C             | 0.31        | 0.9997                 | 6.4x10 <sup>-4</sup> | 0.10%                 |
| BMI      | rs713586   | 2          | 25011512  | <i>RBJ/ADCY3/POMC</i> | C             | 0.14        | 0.9924                 | 0.179                | 0.02%                 |
| BMI      | rs887912   | 2          | 59156381  | <i>FANCL</i>          | T             | 0.1         | 0.9930                 | 0.020                | 0.09%                 |
| BMI      | rs2890652  | 2          | 142676401 | <i>LRP1B</i>          | C             | 0.09        | 0.9658                 | 0.82                 | 0.00%                 |
| BMI      | rs13078807 | 3          | 85966840  | <i>CADM2</i>          | G             | 0.1         | 0.9530                 | 0.17                 | 0.02%                 |
| BMI      | rs9816226  | 3          | 187317193 | <i>ETV5</i>           | T             | 0.14        | 0.9947                 | 9.7x10 <sup>-3</sup> | 0.12%                 |
| BMI      | rs10938397 | 4          | 44877284  | <i>GNPDA2</i>         | G             | 0.18        | 0.8209                 | 0.072                | 0.05%                 |
| BMI      | rs13107325 | 4          | 103407732 | <i>SLC39A8</i>        | T             | 0.19        | 0.7212                 | 0.25                 | 0.00%                 |
| BMI      | rs2112347  | 5          | 75050998  | <i>FLJ35779/HMGCR</i> | T             | 0.1         | 0.9192                 | 0.68                 | 0.00%                 |
| BMI      | rs4836133  | 5          | 124360002 | <i>ZNF608</i>         | A             | 0.07        | 0.8723                 | 0.75                 | 0.00%                 |
| BMI      | rs206936   | 6          | 34410847  | <i>HMGA1</i>          | G             | 0.06        | 0.9972                 | 0.54                 | 0.00%                 |
| BMI      | rs987237   | 6          | 50911009  | <i>TFAP2B</i>         | G             | 0.13        | 0.9993                 | 0.17                 | 0.02%                 |
| BMI      | rs10968576 | 9          | 28404339  | <i>LRRN6C</i>         | G             | 0.11        | 0.9973                 | 0.041                | 0.07%                 |
| BMI      | rs4929949  | 11         | 8561169   | <i>RPL27A</i>         | C             | 0.06        | 0.9611                 | 0.91                 | 0.00%                 |
| BMI      | rs10767664 | 11         | 27682562  | <i>BDNF</i>           | A             | 0.19        | 0.9965                 | 0.53                 | 0.00%                 |
| BMI      | rs3817334  | 11         | 47607569  | <i>MTCH2</i>          | T             | 0.06        | 0.9961                 | 0.56                 | 0.00%                 |
| BMI      | rs7138803  | 12         | 48533735  | <i>FAIM2</i>          | A             | 0.12        | 0.9961                 | 0.55                 | 0.00%                 |
| BMI      | rs4771122  | 13         | 26918180  | <i>MTIF3</i>          | G             | 0.09        | 0.9277                 | 0.026                | 0.08%                 |
| BMI      | rs11847697 | 14         | 29584863  | <i>PRKD1</i>          | T             | 0.17        | 0.9443                 | 0.19                 | 0.02%                 |



|      |                        |    |           |                  |   |    |        |                      |       |
|------|------------------------|----|-----------|------------------|---|----|--------|----------------------|-------|
| LDLc | rs12027135             | 1  | 25648320  | <i>LDLRAP1</i>   | T | NA | 0.9703 | 0.88                 | 0.00% |
| LDLc | rs2479409              | 1  | 55277238  | <i>PCSK9</i>     | G | NA | 0.5645 | 0.33                 | 0.00% |
| LDLc | rs2131925              | 1  | 62798530  | <i>ANGPTL3</i>   | T | NA | 0.9975 | 0.80                 | 0.00% |
| LDLc | rs629301               | 1  | 109619829 | <i>SORT1</i>     | T | NA | 0.9978 | $2.6 \times 10^{-7}$ | 0.97% |
| LDLc | rs2642442              | 1  | 219040186 | <i>MOSC1</i>     | T | NA | 0.8561 | 0.38                 | 0.00% |
| LDLc | rs514230               | 1  | 232925220 | <i>IRF2BP2</i>   | T | NA | 0.9619 | 0.019                | 0.17% |
| LDLc | rs1367117              | 2  | 21117405  | <i>APOB</i>      | A | NA | 0.8193 | $6.2 \times 10^{-8}$ | 1.07% |
| LDLc | rs4299376              | 2  | 43926080  | <i>ABCG5/8</i>   | G | NA | 0.8800 | 0.14                 | 0.05% |
| LDLc | rs12916                | 5  | 74692295  | <i>HMGCR</i>     | C | NA | 0.9536 | $9.4 \times 10^{-4}$ | 0.38% |
| LDLc | rs6882076              | 5  | 156322875 | <i>TIMD4</i>     | C | NA | 0.9540 | 0.14                 | 0.05% |
| LDLc | rs3757354              | 6  | 16235386  | <i>MYLIP</i>     | C | NA | 0.9977 | 0.46                 | 0.00% |
| LDLc | rs1800562              | 6  | 26201120  | <i>HFE</i>       | G | NA | 0.9985 | 0.64                 | 0.00% |
| LDLc | rs3177928 <sup>1</sup> | 6  | 32520413  | <i>HLA</i>       | A | NA | 0.9967 | 0.26                 | 0.01% |
| LDLc | rs9488822              | 6  | 116419586 | <i>FRK</i>       | A | NA | 0.9270 | 0.99                 | 0.00% |
| LDLc | rs1564348              | 6  | 160498850 | <i>LPA</i>       | C | NA | 0.9973 | 0.47                 | 0.00% |
| LDLc | rs12670798             | 7  | 21573877  | <i>DNAH11</i>    | C | NA | 0.9969 | 0.41                 | 0.00% |
| LDLc | rs2072183              | 7  | 44545705  | <i>NPC1L1</i>    | C | NA | 0.5197 | 0.79                 | 0.00% |
| LDLc | rs9987289              | 8  | 9220768   | <i>PPP1R3B</i>   | G | NA | 0.9852 | 0.37                 | 0.00% |
| LDLc | rs2081687              | 8  | 59551119  | <i>CYP7A1</i>    | T | NA | 0.9782 | 0.78                 | 0.00% |
| LDLc | rs2954029              | 8  | 126560154 | <i>TRIB1</i>     | A | NA | 0.9851 | 0.19                 | 0.03% |
| LDLc | rs11136341             | 8  | 145115531 | <i>PLEC1</i>     | G | NA | 0.7574 | 0.18                 | 0.03% |
| LDLc | rs9411489 <sup>2</sup> | 9  | 135144821 | <i>ABO</i>       | T | NA | NA     | NA                   | NA    |
| LDLc | rs2255141              | 10 | 113923876 | <i>GPAM</i>      | A | NA | 0.9971 | 0.10                 | 0.07% |
| LDLc | rs174546               | 11 | 61326406  | <i>FADS1-2-3</i> | C | NA | 0.9997 | $3.6 \times 10^{-3}$ | 0.28% |
| LDLc | rs964184               | 11 | 116154127 | <i>APOA1</i>     | G | NA | 0.9594 | 0.37                 | 0.00% |
| LDLc | rs11220462             | 11 | 125749162 | <i>ST3GAL4</i>   | A | NA | 0.9651 | 0.18                 | 0.03% |
| LDLc | rs11065987             | 12 | 110556807 | <i>BRAP</i>      | A | NA | 0.9373 | 0.34                 | 0.00% |
| LDLc | rs1169288              | 12 | 119901033 | <i>HNF1A</i>     | C | NA | 0.9483 | 0.094                | 0.07% |
| LDLc | rs8017377              | 14 | 23953727  | <i>NYNRIN</i>    | A | NA | 0.9941 | 0.15                 | 0.04% |

|      |            |    |          |               |   |    |        |                      |       |
|------|------------|----|----------|---------------|---|----|--------|----------------------|-------|
| LDLc | rs3764261  | 16 | 55550825 | <i>CETP</i>   | C | NA | 0.9960 | $7.3 \times 10^{-3}$ | 0.23% |
| LDLc | rs2000999  | 16 | 70665594 | <i>HPR</i>    | A | NA | 0.9025 | 0.22                 | 0.02% |
| LDLc | rs7206971  | 17 | 42780114 | <i>OSBPL7</i> | A | NA | 0.9896 | 0.14                 | 0.05% |
| LDLc | rs6511720  | 19 | 11063306 | <i>LDLR</i>   | G | NA | 0.9285 | $8.7 \times 10^{-4}$ | 0.38% |
| LDLc | rs10401969 | 19 | 19268718 | <i>CILP2</i>  | T | NA | 0.8310 | $2.0 \times 10^{-3}$ | 0.32% |
| LDLc | rs4420638  | 19 | 50114786 | <i>APOE</i>   | G | NA | 0.5558 | $1.9 \times 10^{-5}$ | 0.66% |
| LDLc | rs2902940  | 20 | 38524901 | <i>MAFB</i>   | A | NA | 0.9855 | 0.66                 | 0.00% |
| LDLc | rs6029526  | 20 | 39106032 | <i>TOP1</i>   | A | NA | 0.9808 | 0.48                 | 0.00% |

<sup>1</sup> Variants +/- 2 MB around this region were excluded from the calculations excluding known regions because of the high linkage disequilibrium in this part of the genome

<sup>2</sup> This SNP could not be imputed and so did not contribute to the allelic score for LDLc consisting of known variants only, but variants +/- 1 MB around it were still excluded from the calculations involving excluding known regions

<sup>3</sup> RSQR imputation accuracy as calculated by MACH in the QIMR twins cohort

<sup>4</sup> Proportion of variance explained (adjusted R<sup>2</sup>) in the QIMR twins cohort
