# Supplementary material for: Mining the Human Phenome Using Allelic Scores That Index Biological Intermediates
Source: PubMed Central journal article supplement (PMC3814299; doi:10.1371/journal.pgen.1003919), 2013-10-31
Supplement: pgen.1003919.s018.pdf [file pgen.1003919.s018.pdf]

**Table S9. Performance of BMI SNPs in the CRP meta-analysis**

| BMI SNP    | Chromosome | Gene                  | P value in CRP Meta-analysis |
|------------|------------|-----------------------|------------------------------|
| rs2815752  | 1          | <i>NEGR1</i>          | 0.00037                      |
| rs543874   | 1          | <i>SEC16B</i>         | 0.011                        |
| rs1514175  | 1          | <i>TNNI3K</i>         | 0.0087                       |
| rs1555543  | 1          | <i>PTBP2</i>          | 0.58                         |
| rs2867125  | 2          | <i>TMEM18</i>         | 5.0x10 <sup>-6</sup>         |
| rs713586   | 2          | <i>RBJ/ADCY3/POMC</i> | 0.072                        |
| rs887912   | 2          | <i>FANCL</i>          | 0.036                        |
| rs2890652  | 2          | <i>LRP1B</i>          | 0.26                         |
| rs13078807 | 3          | <i>CADM2</i>          | 0.35                         |
| rs9816226  | 3          | <i>ETV5</i>           | 0.15                         |
| rs13107325 | 4          | <i>SLC39A8</i>        | 0.44                         |
| rs10938397 | 4          | <i>GNPDA2</i>         | 0.39                         |
| rs2112347  | 5          | <i>FLJ35779/HMGCR</i> | 0.43                         |
| rs4836133  | 5          | <i>ZNF608</i>         | 0.040                        |
| rs987237   | 6          | <i>TFAP2B</i>         | 0.0018                       |
| rs206936   | 6          | <i>HMGA1</i>          | 0.65                         |
| rs10968576 | 9          | <i>LRRN6C</i>         | 0.012                        |
| rs3817334  | 11         | <i>MTCH2</i>          | 0.076                        |
| rs10767664 | 11         | <i>BDNF</i>           | 0.38                         |
| rs4929949  | 11         | <i>RPL27A</i>         | 0.90                         |
| rs7138803  | 12         | <i>FAIM2</i>          | 0.12                         |
| rs4771122  | 13         | <i>MTIF3</i>          | 0.10                         |
| rs10150332 | 14         | <i>NRXN3</i>          | 0.013                        |
| rs11847697 | 14         | <i>PRKD1</i>          | 0.00060                      |
| rs2241423  | 15         | <i>MAP2K5</i>         | 0.37                         |
| rs7359397  | 16         | <i>SH2B1</i>          | 0.56                         |
| rs12444979 | 16         | <i>GPRC5B</i>         | 0.40                         |
| rs1558902  | 16         | <i>FTO</i>            | 2.2x10 <sup>-6</sup>         |
| rs571312   | 18         | <i>MC4R</i>           | 3.8x10 <sup>-5</sup>         |

|           |    |                   |        |
|-----------|----|-------------------|--------|
| rs29941   | 19 | <i>KCTD15</i>     | 0.22   |
| rs2287019 | 19 | <i>QPCTL/GIPR</i> | 0.19   |
| rs3810291 | 19 | <i>TMEM160</i>    | 0.0091 |
